# Supplementary material for: Genealogy-Based Methods for Inference of Historical Recombination and Gene Flow and Their Application in Saccharomyces cerevisiae
Source: PubMed Central journal article supplement (PMC3511476; doi:10.1371/journal.pone.0046947), 2012-11-30
Supplement: pone.0046947.s004.pdf [file pone.0046947.s004.pdf]

**Table S1. Genome-wide estimates of the migration parameter  $M$  under a symmetric island model, as inferred from  $F_{ST}$ .**

| Population pair | Mean $F_{ST}$ <sup>a</sup> | $\widehat{M}$ <sup>b</sup> | (5, 95)th percentiles<br>for $\widehat{M}$ |
|-----------------|----------------------------|----------------------------|--------------------------------------------|
| M vs. N.A.      | 0.96                       | 0.07                       | (0, 0.48)                                  |
| M vs. S         | 0.84                       | 0.31                       | (0, 1.52)                                  |
| M vs. W.A.      | 0.97                       | 0.05                       | (0, 0.32)                                  |
| M vs. W/E       | 0.93                       | 0.13                       | (0, 0.57)                                  |
| N.A. vs. S      | 0.69                       | 0.70                       | (0, $\infty$ )                             |
| N.A. vs. W.A.   | 0.98                       | 0.04                       | (0, 0.13)                                  |
| N.A. vs. W/E    | 0.90                       | 0.18                       | (0, 0.93)                                  |
| S vs. W.A.      | 0.79                       | 0.41                       | (0, 2.40)                                  |
| S vs. W/E       | 0.82                       | 0.35                       | (0, 1.45)                                  |
| W.A. vs. W/E    | 0.91                       | 0.15                       | (0, 0.64)                                  |

Each row reports estimated population differentiation and migration parameter values for one pair of yeast populations.

<sup>a</sup> In a given gene window,  $F_{ST}$  is calculated as one minus the ratio of within- to between-population diversity, as given by the mean number of pairwise sequence differences. Mean  $F_{ST}$  is the mean of this value across genes, weighted by length.

<sup>b</sup> A point estimate of the migration parameter  $M$  in a symmetric five-island model, inferred from mean  $F_{ST}$  and using a theoretical prediction of the relationship between  $M$  and  $F_{ST}$  (see MATERIALS & METHODS). Also given are percentiles for this estimate, inferred from the distribution of  $F_{ST}$  across genes.
