# Supplementary material for: Genealogy-Based Methods for Inference of Historical Recombination and Gene Flow and Their Application in Saccharomyces cerevisiae
Source: PubMed Central journal article supplement (PMC3511476; doi:10.1371/journal.pone.0046947), 2012-11-30
Supplement: pone.0046947.s006.pdf [file pone.0046947.s006.pdf]

**Table S3. Parameters for parsimony score used in *kwarg* to reconstruct ancestral recombination graphs**

| Runtime per ARG | Configuration complexity         | Parsimony score = $r^b + \max(am^c/maxam, seq^d/maxseq)$ + the following: |
|-----------------|----------------------------------|---------------------------------------------------------------------------|
| < 2 hrs         | $maxlen^a > 100$                 | $2 \times hk^e$                                                           |
|                 | $50 < maxlen \leq 100$           | $1.5 \times \max(eagl(7)^f, hb(2, 50, 6)^g)$                              |
|                 | $maxlen \leq 50, maxam \geq 100$ | $1.25 \times \max(eagl(10), hb(2, -1, -1))$                               |
|                 | $maxlen \leq 50, maxam < 100$    | $rmin^h$                                                                  |
| > 2 hrs         | $maxlen > 100$                   | $2 \times hk$                                                             |
|                 | $50 < maxlen \leq 100$           | $1.5 \times \max(eagl(5), hb(2, 50, 6))$                                  |
|                 | $maxlen \leq 50, maxam \geq 25$  | $1.25 \times \max(eagl(7), hb(2, 50, 10))$                                |
|                 | $maxlen \leq 50, maxam < 25$     | $rmin$                                                                    |

Shown are parameter choices used in the parsimony score at differing stages of genealogical inference by *kwarg*. At a given stage in the calculation, the set of recombination, mutation, and coalescence events inferred by previous steps determines a set of remaining sequences referred to as the *configuration*. Each row in the table represents parameter values used to calculate the parsimony score when evaluating move choices for the *next* step, at the indicated configuration complexity.

<sup>a</sup> The maximum number of segregating sites remaining after any proposed move.

<sup>b</sup> The number of recombination events in the proposed event (zero or one).

<sup>c</sup> The resulting length of ancestral material after the proposed step (*maxam* is the maximum across all proposed moves).

<sup>d</sup> The number of sequences remaining after the proposed step (*maxseq* is the maximum across all proposed moves).

<sup>e</sup> The Hudson-Kaplan lower bound on the remaining data after the proposed step.

<sup>f</sup> A composite lower bound combining the exact minimum across disjoint intervals.

<sup>g</sup> The haplotype lower bound.

<sup>h</sup> The exact minimum number of recombination events remaining.

Parameters for these bounds are described in Lyngsø *et al.* (2005).
